# Supplementary material
Source: PubMed Central journal article supplement (PMC2782089)
Supplement: emboj2009250s3.pdf [file emboj2009250s3.pdf]

## **Supplemental figure legends**

### **Figure 1: Inhibition of TGF $\beta$ /Smad signaling in m/m MEF does not block premature senescence.**

m/m MEFs were cultured in the presence or absence of 10 $\mu$ M SB431542 and subjected to SA- $\beta$ -gal staining at P3 and P6 (Scale bar: 100 $\mu$ M, Top). The bottom panel showed efficient inhibition of Smad3 phosphorylation by SB431542. Tubulin was used as a loading control.

### **Figure 2: Oncogenic transformation of MEF.**

**A:** Enlarged Fig. 8A. **B:** Enlarged Fig. 8C. **C:** Enlarged Fig. 8D. The scale bar for all panels is 5 $\mu$ M.
