# Supplementary material
Source: PubMed Central journal article supplement (PMC2782089)
Supplement: emboj2009250s4.pdf [file emboj2009250s4.pdf]

Manuscript EMBO-2009-71526

## **SnoN functions as a tumor suppressor by inducing premature senescence**

Deng Pan, Qingwei Zhu

*Corresponding author: Kunxin Luo, Berkeley, Univ. of California at*

---

**Review timeline:**

Submission date:

04 June 2009

Accepted:

29 July 2009

---

No Review Process File is available with this article, as the authors have chosen not to make the review process public in this case.
